# Supplementary material for: Association of atrial fibrillation with outcomes in patients hospitalized with inflammatory bowel disease: an analysis of the National Inpatient Sample
Source: PubMed Central journal article supplement — Arch Med Sci Atheroscler Dis. 2021 Apr 12;6:e40–7. doi: 10.5114/amsad.2021.105256 (PMC8117082; doi:10.5114/amsad.2021.105256), 2021-04-12
Supplement: AMS-AD-6-43819-s1.pdf [file AMS-AD-6-43819-s1.pdf]

**Supplementary Table SI.** International Classification of Diseases, Tenth Revision.

| Variables                              | International Clinical Modification (ICD-10-CM) codes used for study                                                                                                                                                                                                                                                                                                                                                                                                                                    |
|----------------------------------------|---------------------------------------------------------------------------------------------------------------------------------------------------------------------------------------------------------------------------------------------------------------------------------------------------------------------------------------------------------------------------------------------------------------------------------------------------------------------------------------------------------|
| Inflammatory bowel disease             | K5100, K51011, K51012, K51013, K51014, K51018, K51019, K5120, K51211, K51212, K51213, K51214, K51218, K51219, K5130, 51311, K51312, K51313, K51314, K51318, K51319, K5180, 51811, K51812, K51813, K51814, K51818, K51819, K5190, K51911, K51912, K51913, K51914, K51918, K51919, K5000, K5010, K508, K5090, K50011, K50012, K50111, K50112, K50113, K50114, K50118, K50119, K50013, K50014, K50018, 50019, K50811, K50813, K50814, K50818, K50819, K50911, 50912, K50913, K50914, K50918, K50919, K5080 |
| Atrial fibrillation                    | I480, I481, I482, I4891                                                                                                                                                                                                                                                                                                                                                                                                                                                                                 |
| Acute coronary syndrome                | 410.00, 410.01, 410.02, 410.10, 410.11, 410.12, 410.20, 410.21, 410.22, 410.30-410.32, 410.40, 410.41, 410.42, 410.50, 410.51, 410.52, 410.60-410.62, 410.70, 410.71, 410.72, 410.80, 410.81, 410.82, 410.90, 410.91, 410.92                                                                                                                                                                                                                                                                            |
| Congestive Heart Failure               | I5020, I5022, 15030, I5030, I5032, I5040, I5042, I509, I110, I130, I132                                                                                                                                                                                                                                                                                                                                                                                                                                 |
| Acute respiratory failure              | J9600, J9690, J80, J95821, J952, J953, J95811, J95812, S270XXA, S21309A, S271XXA, S272XXA.                                                                                                                                                                                                                                                                                                                                                                                                              |
| Mechanical ventilation                 | 5A1955Z, 5A1945Z                                                                                                                                                                                                                                                                                                                                                                                                                                                                                        |
| Acute kidney injury                    | N170, N171, N172, N178, N179                                                                                                                                                                                                                                                                                                                                                                                                                                                                            |
| Anemia                                 | D508, D509, D510, D511, D513, D518, D520, D521, D528, D529, D531, D530, D532, D538, D539                                                                                                                                                                                                                                                                                                                                                                                                                |
| Chronic lung disease                   | J40, J410, J411, J418, J42, J430, J431, J432, J438, J439, J440, J441, J4520, J4521, J4522, J4530, J4531, J4532, J4540, J4541, J4542, J4550, J4551, J4552, J45901, J45902, J45909, J45990, J45991, J45998, J470, J471, 479, J60, J61, J620, J628, J631, J632, J633, J634, J635, J636, J64, J65, J660, J661, J662, J668, J670, J671, J672, J673, J674, J675, J676, J677, J678, J679, I2781, I2782, I279, J684, J701, J703                                                                                 |
| CAD                                    | I2510, I7090, I1779, I519, I259, I700, I672, I652, I25799, I25798, I25790, I25791, I25709, I25708, I25700, I25701, I2584, I2583, I25119, I25118, I25110, I25111, I25119, I25810, I7209, I25811, I25759, I25750, I25751, I25759, I70209, K511, I78, I7090, I672, G9519, I270                                                                                                                                                                                                                             |
| Peripheral vascular disease            | I7389, I739, I798, I96, I70209, I70219, I70229, I70269, I70299, I7025, I7092                                                                                                                                                                                                                                                                                                                                                                                                                            |
| Tobacco smoking                        | Z87891, F17200, F17203, F17201, F17208F17209                                                                                                                                                                                                                                                                                                                                                                                                                                                            |
| Alcohol use                            | Z811, F1020, F1021, F1102                                                                                                                                                                                                                                                                                                                                                                                                                                                                               |
| Hypertension                           | I10                                                                                                                                                                                                                                                                                                                                                                                                                                                                                                     |
| Obesity                                | E669, Z6830, Z6831, Z6832, Z6833, Z6834, Z6835, Z6836, Z6837, Z6838, Z6839, Z6841, Z6842, Z6843, Z6844, Z6845, Z684                                                                                                                                                                                                                                                                                                                                                                                     |
| Dyslipidemia                           | E785, E7800, E782, E781, E789, E785, E783, E7849, E786                                                                                                                                                                                                                                                                                                                                                                                                                                                  |
| Sepsis                                 | A419, R6520, R6521, R652, A419, A4159, A4150, A4000, A401, A403, A411, A412, A413, A414, A4151, A4152, A4153, A4181, A4101, A4102, A40, A41, A415, A021, A327, A5486, B377, A410, A408, A418, A4189, A419, A409, A408                                                                                                                                                                                                                                                                                   |
| Disseminated intravascular coagulation | D65                                                                                                                                                                                                                                                                                                                                                                                                                                                                                                     |
| Vasopressor requirement                | 3E030XZ, 3E033XZ, 3E040XZ, 3E043XZ, 3E050XZ, 3E053XZ, 3E060XZ, 3E063XZ                                                                                                                                                                                                                                                                                                                                                                                                                                  |
| Venous thromboembolism                 | I8290, I82409, I2699                                                                                                                                                                                                                                                                                                                                                                                                                                                                                    |

**Supplementary Table S1. Cont.**

| <b>Variables</b>       | <b>International Clinical Modification (ICD-10-CM) codes used for study</b>                                                                                                                                                                                                                                                                                                                                                                                                                                                                                                                                                                                                                                                                                                                                                                                                                                                                                                                                                                                                                                                                                                                                                                                                                                                                                                                                                                                                                                                                                                                                                                                                                                                                                                                                                                                                                                                                                                                                                                                                                                                                                                                                              |
|------------------------|--------------------------------------------------------------------------------------------------------------------------------------------------------------------------------------------------------------------------------------------------------------------------------------------------------------------------------------------------------------------------------------------------------------------------------------------------------------------------------------------------------------------------------------------------------------------------------------------------------------------------------------------------------------------------------------------------------------------------------------------------------------------------------------------------------------------------------------------------------------------------------------------------------------------------------------------------------------------------------------------------------------------------------------------------------------------------------------------------------------------------------------------------------------------------------------------------------------------------------------------------------------------------------------------------------------------------------------------------------------------------------------------------------------------------------------------------------------------------------------------------------------------------------------------------------------------------------------------------------------------------------------------------------------------------------------------------------------------------------------------------------------------------------------------------------------------------------------------------------------------------------------------------------------------------------------------------------------------------------------------------------------------------------------------------------------------------------------------------------------------------------------------------------------------------------------------------------------------------|
| Diabetes mellitus      | E1010, E1011, E10610, E10618, E10620, E10621, E10622, E10628, E10630, E10638, E10641, E10649, E1065, E1069, E108, E109, E1100, 1101, E11610, E11618, E11620, E11621, E11622, E11628, E11630, E11638, E11641, E11649, E1165, E1169, E118, E119, E1300, E1301, E1310, E1311, E13610, E13618, E13620, E13621, E13622, E13628, E13630, E13638, E13641, E13649, E1365, E1369, E138, E139, E1021, E1022, E1029, E10311, E10319, E103211, E103212, E103213, E103219, E103291, E103292, E103293, E103299, E103311, E103312, E103313, E103319, E103391, E103392, E103393, E103399, E103411, E103412, E103413, E103419, E103491, E103492, E103493, E103499, E103511, E103512, E103513, E103519, E103521, E103522, E103523, E103529, E103531, E103532, E103533, E103539, E103541, E103542, E103543, E103549, E103551, E103552, E103553, E10355, E103591, E103592, E103593, E103599, E1036, E1037, E1037X1, E1037X2, E1037X3, E1037X9, E1039, E1040, E1041, E1042, E1043, E1044, E1049, E1051, E1052, E1059, E1121, E1122, E1129, E11311, E11319, E113211, E113212, E113213, E11329, E113291, E113292, E113293, E113299, E113311, E113312, E113313, E113319, E113391, E113392, E113393, E113399, E113411, E113412, E113413, E113419, E113491, E113492, E113493, E113499, E113511, E113512, E113513, E113519, E113521, E113522, E113523, E113529, E113531, E113532, E113533, E113539, E113541, E113542, E113543, E113549, E113551, E113552, E113553, E113559, E113591, E113592, E113593, E113599, E1136, E1137, E1137X1, E1137X2, E1137X3, E1137X9, E1139, E1140, E1141, E1142, E1143, E1144, E1149, E1151, E1152, E1159, E1321, E1322, E1329, E13311, E13319, E133211, E133212, E133213, E133219, E133291, E133292, E133293, E133299, E133311, E133312, E133313, E133319, E133391, E133392, E133393, E133399, E133411, E133412, E133413, E133419, E133491, E133492, E133493, E133499, E133511, E133512, E133513, E133519, E133521, E133522, E133523, E133529, E133531, E133532, E133533, E133539, E133541, E133542, E133543, E133549, E133551, E133552, E133553, E133559, E133591, E133592, E133593, E133599, E1336, E1337, E1337X1, E1337X2, E1337X3, E1337X9, E1339, E1340, E1341, E1342, E1343, E1344, E1349, E1351, E1352, E1359 |
| Chronic kidney disease | N181, N182, N183, N184, N185, N189                                                                                                                                                                                                                                                                                                                                                                                                                                                                                                                                                                                                                                                                                                                                                                                                                                                                                                                                                                                                                                                                                                                                                                                                                                                                                                                                                                                                                                                                                                                                                                                                                                                                                                                                                                                                                                                                                                                                                                                                                                                                                                                                                                                       |
